# Supplementary material
Source: publisher site journal article supplement (http://kjim.org/upload/media/kjim-2019-421-suppl.pdf)

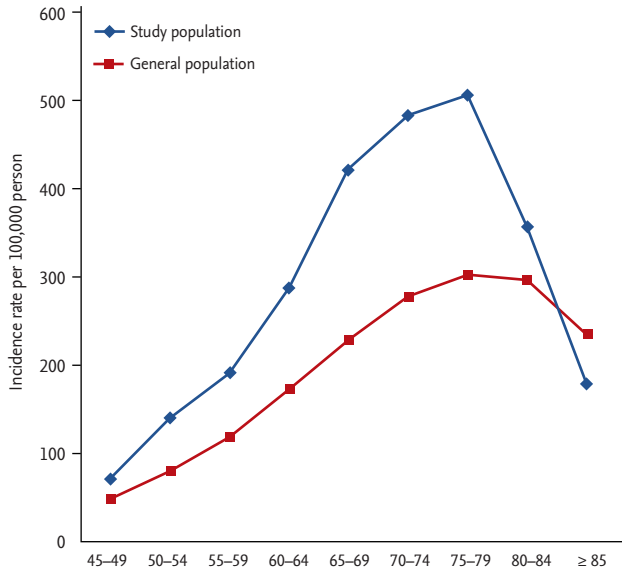

**Supplementary Figure 1.** Distribution of gastric cancer incidence rate (per 100,000 person).

Supplement: Supplementary file 1 [file kjim-2019-421-suppl.pdf]
